# Supplementary material for: Profiling of Individual Desulfo-Glucosinolate Content in Cabbage Head (Brassica oleracea var. capitata) Germplasm
Source: PubMed Central journal article supplement (PMC7221891; doi:10.3390/molecules25081860), 2020-04-17
Supplement: molecules-25-01860-s001.pdf [file molecules-25-01860-s001.pdf]

# **Profiling of individual desulfo-glucosinolate content in cabbage head (*Brassica oleracea* var. *capitata*) germplasm**

Shiva Ram Bhandari<sup>1</sup>, Juhee Rhee<sup>2</sup>, Chang Sun Choi<sup>3</sup>, Jung Su Jo<sup>1</sup>, Yu Kyeong Shin<sup>1</sup>, and Jun Gu Lee<sup>1,4,\*</sup>

<sup>1</sup> *Department of Horticulture, College of Agriculture & Life Sciences, Jeonbuk National University, Jeonju 54896, Korea*

<sup>2</sup> *National Agrobiodiversity Center, National Institute of Agricultural Sciences, Rural Development Administration, Jeonju 54874, Korea*

<sup>3</sup> *Breeding Research Institute, Koregon Co., Ltd, Gimje 54324, Korea*

<sup>4</sup> *Institute of Agricultural Science & Technology, Jeonbuk National University, Jeonju 54896, Korea*

**\*Corresponding author:** Jun Gu Lee, E-mail: [jungu@jbnu.ac.kr](mailto:jungu@jbnu.ac.kr)

Tel: +82-63-270-2581

**Supplementary Material**

**Table S1: The source detail and agronomic characteristic of cabbage genotypes (n=146)**

| SN | IT No. | Temporary No. | Resource Name                          | Origin <sup>1</sup> | Harvest time (d) | Leaf length (cm) | Shape  | Leaf color | Inner color | Head weight (g) | Head height (cm) | Head width (cm) | Height-weight ratio | Core length (cm) |
|----|--------|---------------|----------------------------------------|---------------------|------------------|------------------|--------|------------|-------------|-----------------|------------------|-----------------|---------------------|------------------|
| 1  | 100498 | NA            | Bulamwolga                             | KOR                 | 85               | 45               | Flat   | BRG        | BRG         | 190             | 15.0             | 21.5            | 0.70                | 5.5              |
| 2  | 112268 | NA            | Busajasangamram                        | UNK                 | 80               | 40               | S-F    | DG         | BRG         | 267             | 18.5             | 21.8            | 0.85                | 6.5              |
| 3  | 136505 | NA            | Pride of India                         | NPL                 | 65-70            | 27.5             | Round  | BRG        | BRG         | 530             | 11.5             | 11.5            | 1.00                | 7.5              |
| 4  | 136507 | NA            | NPL-CGS-1986-22766                     | NPL                 | 65-70            | 28               | Round  | DG         | BRG         | 820             | 13.5             | 13.0            | 1.04                | 5.5              |
| 5  | 136509 | NA            | Drum Head                              | NPL                 | 85               | 40               | Flat   | BRG        | BRG         | 825             | 11.2             | 17.3            | 0.65                | 5.4              |
| 6  | 160330 | NA            | Jing Li 1                              | CHN                 | 80-85            | 34               | Flat   | BRG        | BRG         | 1070            | 12.0             | 20.0            | 0.60                | 5.5              |
| 7  | 160331 | NA            | Zhong gan 8                            | CHN                 | 80-85            | 35               | Flat   | BRG        | BRG         | 2020            | 14.0             | 25.0            | 0.56                | 5.0              |
| 8  | 160677 | NA            | Gyongphong 1 ho                        | CHN                 | 85               | 42               | Flat   | BRG        | LG          | 1370            | 12.2             | 22.0            | 0.55                | 5.0              |
| 9  | 180791 | NA            | Late Flat Dutch                        | USA                 | 90               | 38               | Round  | BRG        | BRG         | 900             | 13.5             | 18.0            | 0.75                | 5.5              |
| 10 | 183701 | NA            | Copenhagen Market 86                   | ITA                 | 80-85            | 31               | Round  | G          | G           | 1830            | 17.0             | 16.5            | 1.03                | 7.0              |
| 11 | 189959 | NA            | Mozharskaya                            | RUS                 | 85               | 42               | Round  | DG         | LG          | 1275            | 14.3             | 16.8            | 0.85                | 4.7              |
| 12 | 189961 | NA            | Sud'ya                                 | TKM                 | 85               | 51               | Round  | G          | LG          | 1370            | 14.8             | 19.2            | 0.77                | 4.8              |
| 13 | 189963 | NA            | Skvirskaia N32                         | UKR                 | 90               | 44               | Round  | BRG        | G           | 970             | 12.0             | 17.5            | 0.69                | 6.5              |
| 14 | 189965 | NA            | Zavadovskaya                           | KAZ                 | 90               | 66               | Round  | G          | G           | 1670            | 20.0             | 18.0            | 1.11                | 8.0              |
| 15 | 198909 | NA            | MNG-1996-3665                          | MNG                 | 85               | 40               | Round  | DG         | BRG         | 1205            | 15.7             | 16.8            | 0.93                | 7.2              |
| 16 | 203329 | 703048        | Zavadovskaya                           | KAZ                 | 90               | 40               | Round  | BRG        | BRG         | 850             | 13.6             | 14.3            | 0.95                | 5.1              |
| 17 | 204203 | 707561        | Golden Acre                            | USA                 | 60-65            | 29               | Round  | BRG        | LG          | 500             | 12.0             | 12.0            | 1.00                | 3.5              |
| 18 | 204207 | 707565        | Green Express                          | USA                 | 80-85            | 34.5             | Round  | G          | G           | 2640            | 20.5             | 20.0            | 1.03                | 7.0              |
| 19 | 204220 | 707578        | Slava                                  | RUS                 | 85               | 53               | Round  | BRG        | BRG         | 1975            | 18.5             | 20.2            | 0.92                | 8.1              |
| 20 | 204326 | 709552        | Nonkwawon-1998-3606                    | UNK                 | 75-80            | 33               | Round  | BRG        | G           | 1960            | 17.0             | 18.0            | 0.94                | 6.5              |
| 21 | 206819 | 711498        | Kik-1998-6099                          | UNK                 | 70-75            | 29               | Round  | G          | G           | 940             | 16.0             | 12.0            | 1.33                | 14.5             |
| 22 | NA     | 803346        | Xy maia                                | MNG                 | 80-85            | 40               | Semi-R | BRG        | LG          | 1455            | 15.5             | 17.8            | 0.87                | 5.6              |
| 23 | NA     | 803360        | Zuun kharaa No 1                       | MNG                 | 80-85            | 47               | Round  | BRG        | LG          | 1540            | 14.7             | 17.8            | 0.83                | 7.1              |
| 24 | NA     | 803361        | Zuun kharaa No 2                       | MNG                 | 80-85            | 40               | Round  | BRG, G     | LG          | 1535            | 17.1             | 16.2            | 1.06                | 6.2              |
| 25 | NA     | 803362        | Zuun kharaa No 3                       | MNG                 | 75-80            | 42               | Round  | BRG        | LG          | 1570            | 18.0             | 17.0            | 1.06                | 8.0              |
| 26 | NA     | 803363        | Zuun kharaa No 4                       | MNG                 | 80-85            | 45               | Round  | DG         | BRG         | 1595            | 17.5             | 16.2            | 1.08                | 8.1              |
| 27 | NA     | 803364        | Zuun kharaa No 5                       | MNG                 | 85-90            | 41               | UP-R   | BRG        | LG          | 1385            | 15.9             | 14.7            | 1.08                | 5.2              |
| 28 | NA     | 803365        | Zuun kharaa No 6                       | MNG                 | 85-90            | 48               | Round  | BRG        | LG          | 1515            | 16.8             | 16.2            | 1.04                | 8.2              |
| 29 | NA     | 803366        | Zuun kharaa No 7                       | MNG                 | 85               | 51               | Round  | BRG        | LG          | 1630            | 17.5             | 16.2            | 1.08                | 6.8              |
| 30 | NA     | 803367        | Zuun kharaa No 8                       | MNG                 | 85               | 42               | Round  | BRG        | G, LG       | 1525            | 16.5             | 15.3            | 1.08                | 6.8              |
| 31 | NA     | 803368        | Zuun kharaa No 9                       | MNG                 | 85               | 44               | Round  | BRG        | BRG         | 1430            | 15.1             | 16.8            | 0.90                | 5.7              |
| 32 | NA     | 803369        | Zuun kharaa No 10                      | MNG                 | 85               | 39               | Round  | BRG        | G           | 1065            | 13.6             | 14.7            | 0.93                | 6.2              |
| 33 | NA     | 803370        | Zuun kharaa No 11                      | MNG                 | 85               | 48               | Round  | BRG        | BRG         | 1670            | 15.4             | 17.2            | 0.90                | 5.1              |
| 34 | NA     | 803371        | Zuun kharaa No 12                      | MNG                 | 85               | 41               | Round  | BRG        | BRG         | 1380            | 15.7             | 16.2            | 0.97                | 4.8              |
| 35 | NA     | 803372        | Zuun kharaa No 13                      | MNG                 | 85               | 45               | Round  | BRG        | G           | 1210            | 14.6             | 16.1            | 0.91                | 5.8              |
| 36 | NA     | 803373        | Zuun kharaa No 14                      | MNG                 | 80-85            | 40               | Round  | BRG        | BRG         | 1420            | 17.0             | 14.5            | 1.17                | 8.5              |
| 37 | NA     | 803374        | Zuun kharaa No 15                      | MNG                 | 80-85            | 43               | Round  | BRG        | G           | 1410            | 16.0             | 16.0            | 1.00                | 9.5              |
| 38 | NA     | 803375        | Zuun kharaa No 16                      | MNG                 | 85-90            | 43               | Round  | BRG        | G           | 1375            | 16.5             | 15.7            | 1.05                | 6.3              |
| 39 | NA     | 803376        | Zuun kharaa No 17                      | MNG                 | 90               | 32               | Round  | G          | G           | 600             | 14.5             | 12.5            | 1.16                | 5.5              |
| 40 | NA     | 803377        | Zuun kharaa No 18                      | MNG                 | 85-90            | 50               | Round  | G          | BRG         | 1610            | 17.1             | 18.2            | 0.94                | 6.8              |
| 41 | NA     | 903575        | NIS-1999-124                           | NA*                 | 70-75            | 38               | Round  | LG         | LG          | 1350            | 14.5             | 15.5            | 0.94                | 6.0              |
| 42 | NA     | 906760        | Huy udori B-Go                         | JPN                 | 95               | 23               | Round  | G          | G           | 1000            | 14.0             | 18.0            | 0.78                | 7.0              |
| 43 | NA     | 906762        | Kinkei 201                             | NA                  | 80               | 34               | Round  | DG         | G           | 1460            | 16.0             | 16.0            | 1.00                | 6.5              |
| 44 | NA     | 906763        | Kenkei YR 21                           | NA                  | 80               | 34               | Round  | DG         | G           | 1460            | 16.0             | 16.0            | 1.00                | 6.5              |
| 45 | NA     | 906764        | Natsuzoka                              | NA                  | 85               | 44               | Round  | BRG        | G           | 1280            | 12.4             | 18.4            | 0.67                | 5.1              |
| 46 | NA     | 906766        | Ohzora                                 | JPN                 | 85               | 43               | Round  | BRG        | G           | 1225            | 13.9             | 16.8            | 0.83                | 4.4              |
| 47 | NA     | 906776        | Super Red                              | NA                  | 85               | 47               | Round  | P          | P           | 520             | 10.5             | 11.7            | 0.90                | 5.6              |
| 48 | NA     | 906777        | Uji No 1                               | NA                  | 85               | 46               | Semi-F | G          | G           | 1490            | 13.5             | 18.5            | 0.73                | 5.4              |
| 49 | NA     | 906778        | UR Gogetsu                             | NA                  | 85               | 45               | Semi-F | BRG        | G           | 1015            | 14.2             | 16.1            | 0.88                | 4.5              |
| 50 | NA     | 907279        | Yujanka 31                             | RUS                 | 85               | 45               | Round  | BRG        | BRG         | 990             | 13.5             | 12.6            | 1.07                | 4.6              |
| 51 | NA     | 908149        | BOL-AWS-1999-153                       | NA                  | 90               | 54               | Flat   | G, BRG     | G, BRG      | 1160            | 10.0             | 17.5            | 0.57                | 5.5              |
| 52 | NA     | 908150        | BOL-AWS-1999-154                       | NA                  | 75-80            | 32               | Point  | BRG        | DG          | 1160            | 20.0             | 14.0            | 1.43                | 8.0              |
| 53 | NA     | 908151        | BOL-AWS-1999-156                       | NA                  | 80               | 50               | Round  | BRG        | BRG         | 610             | 15.0             | 19.5            | 0.77                | 5.5              |
| 54 | NA     | 908154        | BOL-AWS-1999-562                       | NA                  | 85               | 44               | Round  | BRG        | G           | 1510            | 15.2             | 18.4            | 0.83                | 6.4              |
| 55 | NA     | 908775        | Taskaram                               | UZB                 | 85               | 55               | Round  | LG         | LG          | 960             | 14.8             | 14.7            | 1.01                | 5.2              |
| 56 | NA     | 908777        | Beloko chanaya                         | UZB                 | 85               | 55               | Semi-F | LG         | LG          | 1435            | 14.6             | 18.2            | 0.80                | 8.5              |
| 57 | NA     | K003963       | THA-LSY-2000-76                        | THA                 | 75-80            | 34               | Point  | BRG        | G           | 1700            | 21.5             | 15.5            | 1.39                | 7.0              |
| 58 | NA     | K004353       | Rubin                                  | RUS                 | 80-85            | 52               | Round  | P, G       | P           | 915             | 14.7             | 13.3            | 1.11                | 7.8              |
| 59 | NA     | K004354       | Mars                                   | RUS                 | 80-85            | 34               | Round  | P          | P           | 435             | 7.2              | 9.8             | 0.73                | 4.7              |
| 60 | NA     | K004495       | WIR1855                                | NA                  | 60-65            | 23               | Round  | BG         | BG          | 440             | 11.0             | 11.0            | 1.00                | 4.0              |
| 61 | NA     | K004496       | Zavadovskaya 257/263                   | RUS                 | 60-65            | 32               | Round  | DG         | G           | 920             | 17.0             | 13.5            | 1.26                | 5.0              |
| 62 | NA     | K004497       | Derbentskaya Mestnaya Uluchshennaya 23 | RUS                 | 60-65            | 30               | Round  | G          | G           | 910             | 17.0             | 16.0            | 1.06                | 6.0              |
| 63 | NA     | K004499       | Iyunskaia 3200                         | RUS                 | 75-80            | 36               | Round  | G          | G           | 2800            | 19.2             | 19.8            | 0.97                | 9.8              |
| 64 | NA     | K004500       | WIR 2590                               | NA                  | 75-80            | 40               | Semi-R | G          | G           | 1990            | 17.0             | 20.0            | 0.85                | 9.0              |
| 65 | NA     | K004512       | Luganskaya 7                           | UKR                 | 75-80            | 36               | R-P    | BRG        | G           | 2800            | 19.0             | 21.0            | 0.90                | 5.0              |
| 66 | NA     | K004515       | Nomer Pervyipolyarnyi K-206            | RUS                 | 65-70            | 32.5             | Round  | BRG        | LG          | 750             | 13.0             | 12.5            | 1.04                | 6.0              |
| 67 | NA     | K004520       | Ditnarskaya                            | RUS                 | 60-65            | 28               | Round  | LG         | LG          | 860             | 13.0             | 14.0            | 0.93                | 6.0              |
| 68 | NA     | K004521       | Belorusskaya 455                       | RUS                 | 85-90            | 40               | Round  | BRG        | G           | 1085            | 13.1             | 15.4            | 0.85                | 9.8              |
| 69 | NA     | K004523       | Skorospeilaia                          | RUS                 | 60-65            | 27               | Round  | LG         | LG          | 750             | 12.5             | 15.0            | 0.83                | 4.0              |
| 70 | NA     | K004524       | Losinoostrovskaya                      | RUS                 | 85-90            | 41               | Round  | BRG        | G           | 1625            | 15.7             | 16.8            | 0.93                | 7.6              |
| 71 | NA     | K004525       | Podarok                                | RUS                 | 85-90            | 45               | Semi-F | BRG        | BRG         | 1040            | 12.4             | 19.6            | 0.63                | 5.3              |
| 72 | NA     | K004526       | Sud'ya-146                             | RUS                 | 85-90            | 47               | Semi-F | BRG        | BRG         | 2265            | 17.2             | 23.3            | 0.74                | 10.4             |
| 73 | NA     | K004527       | Kharkovskaya                           | UKR                 | 85-90            | 44               | Semi-F | BRG        | BRG         | 895             | 14.3             | 15.4            | 0.93                | 7.8              |

**Table S1: The source detail and agronomic characteristic of cabbage genotypes (n=146) (Cont<sup>n</sup>).**

| SN  | IT No. | Temporary No. | Resource Name                     | Origin <sup>1</sup> | Harvest time (d) | Leaf length (cm) | Shape    | Leaf color | Inner color | Head weight (g) | Head height (cm) | Head width (cm) | Height-weight ratio | Core length (cm) |
|-----|--------|---------------|-----------------------------------|---------------------|------------------|------------------|----------|------------|-------------|-----------------|------------------|-----------------|---------------------|------------------|
| 74  | NA     | K004532       | Moskovskaya Pozdnyaya             | RUS                 | 85-90            | 52               | Round    | LG         | LG          | 1525            | 19.1             | 17.8            | 1.07                | 6.6              |
| 75  | NA     | K004535       | Slava 1305                        | RUS                 | 85               | 45               | Round    | G          | G           | 1935            | 18.2             | 17.4            | 1.05                | 7.8              |
| 76  | NA     | K004536       | Nadezhda                          | RUS                 | 85               | 53               | Semi-F,P | LG         | G           | 1255            | 14.9             | 17.1            | 0.87                | 6.1              |
| 77  | NA     | K004538       | Iyunsкая                          | RUS                 | 65-70            | 30               | Round    | LG         | LG          | 1210            | 16.5             | 13.5            | 1.22                | 8.0              |
| 78  | NA     | K004540       | Zinovka 1447                      | RUS                 | 85               | 53               | Round    | LG         | LG          | 925             | 17.5             | 15.7            | 1.11                | 8.3              |
| 79  | NA     | K004542       | Slava 1305                        | RUS                 | 80               | 52               | Round    | BRG        | G           | 1105            | 15.3             | 14.8            | 1.03                | 6.5              |
| 80  | NA     | K004543       | Polyarnaya 206                    | RUS                 | 65-70            | 32               | Round    | BRG        | G           | 1070            | 16.0             | 14.0            | 1.14                | 6.0              |
| 81  | NA     | K004545       | Nomer Pervy i Gribovskii 47       | RUS                 | 65-70            | 33               | Round    | G          | G           | 980             | 16.0             | 13.0            | 1.23                | 4.0              |
| 82  | NA     | K004546       | Moskovskaya Pozdnyaya             | RUS                 | 80               | 43               | Round    | BRG        | BRG         | 1020            | 16.2             | 15.3            | 1.06                | 5.0              |
| 83  | NA     | K005289       | Dregonbul                         | NA                  | 65-70            | 31               | Round    | G          | G           | 1500            | 15.0             | 16.0            | 0.94                | 6.5              |
| 84  | NA     | K005290       | Janggun                           | NA                  | 80               | 43               | Semi-F   | G          | G           | 2070            | 14.7             | 20.6            | 0.71                | 8.8              |
| 85  | NA     | K014433       | No.1                              | MNG                 | 80               | 39               | Round    | G          | G           | 800             | 13.6             | 12.8            | 1.06                | 6.5              |
| 86  | NA     | K014950       | CHN-MKH-2001-100                  | NA                  | 65-70            | 29               | Round    | G          | G           | 1810            | 16.5             | 16.5            | 1.00                | 5.0              |
| 87  | NA     | K014955       | CHN-MKH-2001-139                  | NA                  | 65-70            | 29               | Round    | G          | G           | 1300            | 15.0             | 15.5            | 0.97                | 6.0              |
| 88  | NA     | K044570       | NPL-GYS-2004-26                   | NPL                 | 65-70            | 33               | Round    | BRG        | BRG         | 710             | 12.5             | 13.0            | 0.96                | 4.5              |
| 89  | NA     | K045062       | Kashirka 202                      | RUS                 | 80               | 48               | Round    | BRG        | BRG         | 790             | 13.3             | 14.4            | 0.92                | 6.5              |
| 90  | NA     | K045064       | Valcatieskaya                     | RUS                 | 80               | 42               | Round    | BRG        | BRG         | 920             | 14.1             | 13.5            | 1.04                | 3.8              |
| 91  | NA     | K060636       | roxo                              | NA                  | 80               | 41               | Round    | GP         | P           | 695             | 14.3             | 11.2            | 1.28                | 6.3              |
| 92  | NA     | K100196       | Predzvest                         | NA                  | 65-70            | 28               | Round    | G          | G           | 1280            | 18.0             | 17.0            | 1.06                | 8.5              |
| 93  | NA     | K100197       | Pourovo cervene                   | NA                  | 80               | 53               | Round    | GP         | P           | 960             | 15.7             | 12.8            | 1.23                | 6.4              |
| 94  | NA     | K121377       | UZB-KJG-2006-37                   | KGZ                 | 80               | 46               | Round    | BRG        | LG          | 830             | 12.8             | 14.2            | 0.90                | 8.3              |
| 95  | NA     | K125498       | Paz. Podobr                       | NA                  | 80               | 50               | Round    | GP         | GP          | 1080            | 14.4             | 16.5            | 0.87                | 5.8              |
| 96  | NA     | K125499       | Kose 27                           | NA                  | 80               | 43               | Round    | DG         | LG          | 1285            | 15.1             | 16.4            | 0.92                | 9.1              |
| 97  | NA     | K134135       | A'T16                             | TUR                 | 80               | 43               | Round    | GP         | P           | 1070            | 14.7             | 13.1            | 1.12                | 5.1              |
| 98  | NA     | K134260       | HA15                              | TUR                 | 90               | 48               | Round    | GP         | P           | 720             | 12.5             | 11.0            | 1.14                | 8.5              |
| 99  | NA     | K134820       | Pazardzhishko podobreno 16        | BGR                 | 80               | 50               | Round    | LP         | LP          | 1140            | 14.5             | 16.2            | 0.90                | 6.1              |
| 100 | NA     | K136870       | Kyuse (=bold)                     | BGR                 | 90               | 56               | Flat     | BRG        | BRG         | 1750            | 15.0             | 19.5            | 0.77                | 8.5              |
| 101 | NA     | K138940       | C.M                               | NA                  | 65-70            | 30               | Round    | BRG        | BRG         | 1130            | 15.0             | 15.0            | 1.00                | 7.0              |
| 102 | NA     | K139046       | Rethudoru-Khi                     | NA                  | 80               | 38               | Round    | GP         | P           | 1180            | 12.4             | 15.7            | 0.79                | 6.8              |
| 103 | NA     | K139130       | Sagyahwak                         | NA                  | 85               | 57               | Round    | G          | G           | 1205            | 14.3             | 17.8            | 0.80                | 4.2              |
| 104 | NA     | K139318       | Ohina                             | NA                  | 75-80            | 34               | Semi-F   | BRG        | G           | 2730            | 17.5             | 22.0            | 0.80                | 6.0              |
| 105 | NA     | K142931       | Sadya                             | KGZ                 | 90               | 32               | Round    | BRG        | BRG         | 890             | 13.0             | 16.0            | 0.81                | 8.0              |
| 106 | NA     | K145099       | Kantarotopu                       | TUR                 | 85               | 38               | Round    | BRG        | P           | 950             | 15.3             | 12.7            | 1.20                | 6.1              |
| 107 | NA     | K145187       | Kirmizi                           | TUR                 | 90               | 32               | Round    | GP         | P           | 830             | 13.0             | 10.0            | 1.30                | 7.0              |
| 108 | NA     | K146556       | A8E0243                           | BGR                 | 85               | 46               | Round    | BRG        | G           | 1715            | 17.1             | 17.4            | 0.98                | 5.5              |
| 109 | NA     | K154726       | Akimakigokuwase                   | JPN                 | 75-80            | 37               | R, P     | G          | LG          | 1430            | 16.0             | 20.0            | 0.80                | 7.5              |
| 110 | NA     | K155038       | Tashkent 110                      | UZB                 | 85               | 47               | Round    | DG         | LG          | 925             | 13.2             | 14.8            | 0.89                | 6.6              |
| 111 | NA     | K155067       | UZB-GJG-2009-10/3-09              | NA                  | 85               | 46               | Round    | LG         | LG          | 1590            | 15.4             | 19.3            | 0.80                | 9.2              |
| 112 | NA     | K155659       | CT-99                             | KOR                 | 65-70            | 29               | Round    | G          | G           | 1060            | 14.0             | 16.0            | 0.88                | 6.0              |
| 113 | NA     | K155662       | CT-115                            | KOR                 | 75-80            | 34               | Round    | DG         | G           | 1300            | 16.0             | 14.0            | 1.14                | 5.0              |
| 114 | NA     | K155664       | CT-117                            | KOR                 | 80               | 40               | Round    | DG         | G           | 1545            | 16.6             | 15.2            | 1.09                | 5.7              |
| 115 | NA     | K164144       | CHN-AWS-2010-12                   | CHN                 | 65-70            | 26               | Round    | G          | G           | 1090            | 14.5             | 14.0            | 1.04                | 3.5              |
| 116 | NA     | K164742       | Charleston wakefield              | PER                 | 75-80            | 37               | R, P     | G          | G           | 1210            | 17.0             | 15.5            | 1.10                | 6.5              |
| 117 | NA     | K166200       | 1740                              | KOR                 | 85               | 42               | Round    | BRG        | BRG         | 475             | 9.2              | 11.3            | 0.81                | 4.2              |
| 118 | NA     | K166201       | 1780                              | KOR                 | 75-80            | 38               | Round    | BRG        | BRG         | 1380            | 14.0             | 17.0            | 0.82                | 5.0              |
| 119 | NA     | K166205       | 153                               | KOR                 | 100              | 41.5             | Round    | DG         | G           | 1000            | 15.0             | 14.0            | 1.07                | 6.0              |
| 120 | NA     | K166231       | Ne 1                              | CHN                 | 60-65            | 31               | Round    | G          | G           | 1290            | 15.0             | 17.0            | 0.88                | 5.0              |
| 121 | NA     | K166237       | Doberrot                          | DEU                 | 85               | 33               | Round    | P-G        | P           | 670             | 13.1             | 10.2            | 1.28                | 5.3              |
| 122 | NA     | K166240       | Red Drumhead 2                    | SWE                 | 85               | 43               | Round    | P-G        | P-G         | 490             | 12.5             | 10.2            | 1.23                | 4.4              |
| 123 | NA     | K175584       | 213                               | KOR                 | 65-70            | 33.5             | Round    | G          | G           | 1260            | 15.5             | 14.0            | 1.11                | 5.5              |
| 124 | NA     | K176590       | Da shanghai xin zheng chin ganlan | CHN                 | 75-80            | 41               | Round    | G          | G           | 2160            | 20.0             | 17.0            | 1.18                | 5.0              |
| 125 | NA     | K176592       | Qing Feng                         | CHN                 | 80-85            | 40               | Round    | BRG        | BRG         | 2330            | 19.0             | 19.5            | 0.97                | 5.5              |
| 126 | NA     | K176593       | Zhong Gan 21                      | CHN                 | 60-65            | 29               | Round    | G          | G           | 1240            | 16.5             | 17.0            | 0.97                | 5.5              |
| 127 | NA     | K176594       | Zao Hong                          | CHN                 | 75-80            | 30               | Round    | P          | P           | 2430            | 18.0             | 17.5            | 1.03                | 12.0             |
| 128 | NA     | K176595       | Zhong Gan 11                      | CHN                 | 65-70            | 32               | Round    | G          | G           | 1250            | 15.0             | 16.0            | 0.94                | 6.0              |
| 129 | NA     | K195951       | Golden Acre Imp                   | IND                 | 65-70            | 30               | Round    | G          | G           | 710             | 12.0             | 14.0            | 0.86                | 4.0              |
| 130 | NA     | K204466       | CT-260                            | KOR                 | 65-70            | 22               | Round    | G          | G           | 750             | 12.5             | 12.0            | 1.04                | 4.0              |
| 131 | NA     | K222934       | CH 83                             | KOR                 | 80-85            | 32               | Round    | BRG        | BRG         | 980             | 14.5             | 13.1            | 1.11                | 6.1              |
| 132 | NA     | K229554       | PER-LYH-2013-3                    | PER                 | 75-80            | 32               | Point    | BL         | BL          | 1232            | 20.0             | 15.0            | 1.33                | 10.0             |
| 133 | NA     | K243791       | KS 142                            | THA                 | 80               | 41               | Round    | PG         | P           | 790             | 13.5             | 13.0            | 1.04                | 6.5              |
| 134 | NA     | K243819       | Miya Bi                           | THA                 | 80-85            | 42               | Round    | G          | G           | 1865            | 14.4             | 19.2            | 0.75                | 8.1              |
| 135 | NA     | K246353       | 90ms                              | KOR                 | 80-85            | 34               | Round    | BRG        | BRG         | 1140            | 15.8             | 13.6            | 1.16                | 7.2              |
| 136 | NA     | K246359       | P15-41                            | KOR                 | 80-85            | 30               | Round    | G          | G           | 1265            | 14.5             | 15.7            | 0.92                | 5.4              |
| 137 | NA     | K246894       | Succession Green Leaved           | ARM                 | 80-85            | 45               | Flat     | BRG        | BRG         | 750             | 10.3             | 16.8            | 0.61                | 6.4              |
| 138 | NA     | K246912       | A5-7                              | TWN                 | 75-80            | 46               | Round    | BRG        | G           | 1380            | 14.0             | 16.0            | 0.88                | 7.0              |
| 139 | NA     | K247130       | N 127                             | NA                  | 95               | 39               | Round    | G          | G           | 830             | 14.0             | 13.5            | 1.04                | 6.0              |
| 140 | NA     | K247132       | Mihnevskaya                       | RUS                 | 80-85            | 34               | Round    | PG         | PG          | 1750            | 14.2             | 13.1            | 1.08                | 6.7              |
| 141 | NA     | K247133       | Kopengagenskaya                   | NA                  | 80-85            | 50               | Round    | PG         | PG          | 1160            | 13.7             | 13.8            | 0.99                | 9.5              |
| 142 | NA     | K247714       | TJK-PHJ-2014-2-21                 | TJK                 | 80-85            | 47               | Round    | BRG        | G           | 1410            | 15.7             | 16.4            | 0.96                | 9.3              |
| 143 | NA     | K247741       | TJK-PHJ-2014-6-8                  | TJK                 | 80-85            | 43               | Round    | BRG        | BRG         | 1125            | 14.9             | 15.6            | 0.96                | 5.2              |
| 144 | NA     | K247748       | TJK-PHJ-2014-6-16                 | UZB                 | 80-85            | 48               | Round    | BRG        | G           | 1345            | 14.6             | 14.2            | 1.03                | 6.2              |
| 145 | NA     | K247794       | Apsheronskaya                     | TJK                 | 80-85            | 47               | Round    | G          | G           | 910             | 17.2             | 13.8            | 1.25                | 4.2              |
| 146 | NA     | K254252       | Likani                            | GEO                 | 80-85            | 40               | Round    | G          | G           | 795             | 15.8             | 15.2            | 1.04                | 5.2              |

NA: information not available; R,P: round and pointed; Semi-F: Semi-flat;; Semi-R: semi-round; UP-R: upper pointed-round; BRG: bright green; DG: dark green; G: green; LG: light green; P-G: purple green, P: purple. Origin<sup>1</sup>:  $\alpha$ -3 country code.

**Table S2: Variation in GSLs profile and concentration ( $\mu\text{mol g}^{-1}$  DW) in cabbage head (n=146).**

| SN | IT No. | Temporary No. | GIB  | PRO  | EPI  | SIN   | GRA  | GNA  | 4HGBS | GER  | GBS   | 4MGBS | GNS  | NGBS | Total GSLs |
|----|--------|---------------|------|------|------|-------|------|------|-------|------|-------|-------|------|------|------------|
| 1  | 100498 | NA            | 0.75 | 0.25 | 0.12 | 1.87  | 0.04 | 0.15 | 0.08  | ND   | 3.74  | 0.33  | 0.05 | 0.32 | 7.70       |
| 2  | 112268 | NA            | 1.21 | 0.38 | 0.06 | 1.07  | 0.20 | 0.14 | 0.13  | ND   | 5.72  | 0.86  | ND   | 0.11 | 9.87       |
| 3  | 136505 | NA            | 3.01 | 0.60 | 0.11 | 7.22  | 0.22 | 0.57 | 0.03  | ND   | 4.72  | 0.23  | ND   | 0.64 | 17.33      |
| 4  | 136507 | NA            | 3.68 | 0.67 | 0.12 | 6.92  | 0.35 | 0.36 | 0.05  | ND   | 4.80  | 0.12  | 0.24 | 0.33 | 17.65      |
| 5  | 136509 | NA            | 2.59 | 0.62 | 0.15 | 6.45  | 0.22 | 0.27 | 0.04  | ND   | 6.00  | 0.18  | ND   | 0.93 | 17.44      |
| 6  | 160330 | NA            | 3.20 | 0.22 | 0.08 | 2.64  | 0.13 | 0.14 | 0.02  | ND   | 3.77  | 0.36  | ND   | 0.16 | 10.72      |
| 7  | 160331 | NA            | 0.57 | 2.29 | 0.17 | 1.24  | 0.83 | 0.65 | ND    | ND   | 5.96  | 0.15  | 0.12 | 0.28 | 12.27      |
| 8  | 160677 | NA            | 3.15 | 0.86 | 0.10 | 6.33  | 0.31 | 0.25 | 0.17  | ND   | 4.50  | 0.75  | 0.62 | 0.14 | 17.17      |
| 9  | 180791 | NA            | 4.87 | 0.49 | 0.09 | 5.77  | 0.31 | 0.23 | 0.11  | ND   | 9.08  | 0.27  | 0.12 | 1.27 | 22.60      |
| 10 | 183701 | NA            | 0.86 | 0.36 | 0.10 | 7.33  | ND   | 0.16 | 0.04  | ND   | 2.36  | 0.49  | ND   | 0.43 | 12.13      |
| 11 | 189959 | NA            | 0.80 | 1.67 | 0.14 | 0.70  | 2.41 | 0.73 | 0.05  | ND   | 8.67  | 0.43  | 0.16 | 1.57 | 17.32      |
| 12 | 189961 | NA            | 0.05 | ND   | 0.11 | 0.09  | 2.06 | ND   | 0.05  | ND   | 4.50  | 0.28  | 0.16 | 0.94 | 8.26       |
| 13 | 189963 | NA            | 2.02 | 0.45 | 0.14 | 2.98  | 0.22 | 0.22 | 0.10  | ND   | 10.10 | 0.38  | ND   | 0.20 | 16.81      |
| 14 | 189965 | NA            | 0.55 | 0.70 | 0.11 | 0.16  | 2.60 | 0.41 | 0.16  | ND   | 5.54  | 0.38  | ND   | 0.46 | 11.07      |
| 15 | 198909 | NA            | 1.52 | 0.38 | 0.12 | 3.70  | 0.12 | 0.32 | 0.07  | ND   | 2.95  | 0.19  | 0.08 | 0.51 | 9.96       |
| 16 | 203329 | 703048        | 2.35 | 0.60 | 0.13 | 5.55  | 0.22 | 0.29 | ND    | ND   | 6.94  | 0.19  | 0.19 | 0.16 | 16.62      |
| 17 | 204203 | 707561        | 2.10 | 0.32 | 0.09 | 3.28  | 0.05 | 0.07 | 0.01  | ND   | 3.48  | 0.10  | 0.10 | 1.70 | 11.32      |
| 18 | 204207 | 707565        | 0.89 | 0.45 | 0.09 | 6.07  | 0.06 | 0.41 | 0.07  | ND   | 1.32  | 0.28  | 0.23 | 0.20 | 10.07      |
| 19 | 204220 | 707578        | 2.60 | 0.33 | 0.11 | 2.51  | 0.35 | 0.27 | 0.05  | ND   | 4.92  | 0.17  | 0.15 | 0.44 | 11.90      |
| 20 | 204326 | 709552        | 1.37 | 0.21 | 0.13 | 3.22  | 0.06 | 0.25 | 0.04  | ND   | 2.25  | 0.11  | 0.19 | 0.46 | 8.29       |
| 21 | 206819 | 711498        | 1.82 | 0.39 | 0.18 | 5.72  | 0.08 | 0.18 | 0.02  | ND   | 2.42  | 0.15  | 0.14 | 0.21 | 11.31      |
| 22 | NA     | 803346        | 3.12 | 0.04 | 0.08 | 2.09  | 0.06 | 0.06 | 0.02  | ND   | 1.74  | 0.29  | ND   | 0.20 | 7.70       |
| 23 | NA     | 803360        | 4.06 | 0.20 | 0.08 | 4.48  | 0.11 | 0.13 | 0.03  | ND   | 4.03  | 0.19  | ND   | 0.25 | 13.55      |
| 24 | NA     | 803361        | 0.62 | 0.64 | 0.11 | 0.77  | 0.70 | 0.46 | 0.03  | ND   | 2.67  | 0.21  | ND   | 0.20 | 6.40       |
| 25 | NA     | 803362        | 0.61 | 0.61 | 0.14 | 0.93  | 0.43 | 0.45 | 0.07  | ND   | 2.37  | 0.14  | 0.07 | 0.18 | 5.99       |
| 26 | NA     | 803363        | 3.13 | 0.16 | 0.10 | 3.88  | 0.13 | 0.11 | 0.04  | ND   | 4.42  | 0.21  | 0.13 | 0.75 | 13.05      |
| 27 | NA     | 803364        | 2.25 | 0.11 | 0.07 | 4.00  | 0.07 | 0.12 | 0.21  | ND   | 2.35  | 0.54  | 0.14 | 0.68 | 10.53      |
| 28 | NA     | 803365        | 1.32 | 0.52 | 0.14 | 7.22  | 0.20 | 0.35 | 0.03  | ND   | 2.18  | 0.20  | 0.30 | 0.17 | 12.62      |
| 29 | NA     | 803366        | 1.00 | 1.90 | 0.14 | 2.10  | 1.27 | 1.77 | 0.16  | 0.15 | 2.83  | 0.16  | 0.07 | 0.11 | 11.65      |
| 30 | NA     | 803367        | 1.48 | 0.33 | 0.09 | 4.44  | 0.20 | 0.27 | 0.04  | ND   | 1.07  | 0.21  | 0.11 | 0.12 | 8.36       |
| 31 | NA     | 803368        | 0.73 | 0.10 | 0.08 | 3.18  | 0.03 | 0.10 | 0.05  | ND   | 3.79  | 0.20  | 0.09 | 0.97 | 9.32       |
| 32 | NA     | 803369        | 2.35 | 0.52 | 0.10 | 10.29 | 0.13 | 0.56 | 0.04  | ND   | 4.38  | 0.17  | 0.28 | 0.56 | 19.38      |
| 33 | NA     | 803370        | 0.30 | 2.15 | 0.22 | 1.53  | 0.45 | 2.24 | 0.05  | ND   | 0.79  | 0.12  | 0.07 | 0.11 | 8.02       |
| 34 | NA     | 803371        | 1.72 | 0.83 | 0.13 | 1.32  | 1.26 | 0.50 | 0.04  | 0.10 | 2.67  | 0.13  | 0.09 | 0.13 | 8.92       |
| 35 | NA     | 803372        | 2.20 | 0.14 | 0.12 | 1.46  | 0.18 | 0.14 | 0.04  | ND   | 1.50  | 0.20  | ND   | 0.29 | 6.28       |
| 36 | NA     | 803373        | 2.13 | 0.26 | 0.10 | 2.97  | 0.20 | 0.15 | 0.07  | ND   | 7.40  | 0.27  | 0.31 | 0.39 | 14.24      |
| 37 | NA     | 803374        | 4.55 | 0.50 | 0.10 | 8.28  | 0.21 | 0.32 | 0.04  | ND   | 4.51  | 0.40  | ND   | 0.30 | 19.21      |
| 38 | NA     | 803375        | 0.89 | 1.69 | 0.14 | 1.12  | 1.56 | 1.21 | 0.05  | ND   | 2.82  | 0.30  | ND   | 0.35 | 10.13      |
| 39 | NA     | 803376        | 1.38 | 0.34 | 0.06 | 5.09  | 0.06 | 0.15 | 0.07  | ND   | 2.42  | 0.07  | 0.08 | 0.34 | 10.07      |
| 40 | NA     | 803377        | 2.52 | 0.30 | 0.11 | 4.51  | 0.19 | 0.32 | 0.17  | ND   | 4.10  | 0.14  | 0.23 | 0.50 | 13.07      |
| 41 | NA     | 903575        | 2.22 | 0.46 | 0.08 | 7.88  | 0.10 | 0.35 | ND    | ND   | 3.00  | 0.13  | 0.47 | 0.29 | 14.99      |
| 42 | NA     | 906760        | 1.47 | 0.52 | ND   | 4.86  | 0.18 | 0.24 | 0.02  | ND   | 3.50  | 0.36  | 0.16 | 0.36 | 11.66      |
| 43 | NA     | 906762        | 0.57 | 0.20 | 0.09 | 0.83  | 0.09 | 0.13 | 0.03  | 0.10 | 2.93  | 0.29  | ND   | 0.10 | 5.36       |
| 44 | NA     | 906763        | 0.78 | 0.19 | 0.07 | 0.99  | 0.10 | 0.14 | 0.17  | 0.11 | 2.52  | 0.50  | ND   | 0.08 | 5.64       |
| 45 | NA     | 906764        | 1.08 | 3.28 | 0.22 | 2.17  | 1.47 | 1.60 | 0.08  | 0.12 | 7.46  | 0.13  | ND   | 0.22 | 17.82      |
| 46 | NA     | 906766        | 1.76 | 0.34 | 0.16 | 3.91  | 0.13 | 0.13 | 0.06  | ND   | 6.32  | 0.18  | 0.12 | 0.15 | 13.26      |
| 47 | NA     | 906775        | 0.91 | 1.72 | 0.14 | 1.90  | 0.66 | 0.88 | 0.10  | ND   | 6.60  | 1.01  | ND   | 0.43 | 14.35      |
| 48 | NA     | 906776        | 1.64 | 0.11 | 0.13 | 4.47  | 0.10 | 0.07 | 0.02  | ND   | 4.34  | 0.18  | ND   | 0.23 | 11.29      |
| 49 | NA     | 906777        | 2.11 | 0.44 | 0.11 | 2.81  | 0.29 | 0.23 | 0.02  | ND   | 10.60 | 0.47  | 0.26 | 0.32 | 17.65      |
| 50 | NA     | 907279        | 2.79 | 1.03 | 0.09 | 11.29 | 0.20 | 0.53 | 0.06  | ND   | 3.25  | 0.10  | 0.24 | 0.28 | 19.86      |
| 51 | NA     | 908149        | 2.92 | 1.17 | 0.12 | 12.87 | 0.20 | 0.61 | 0.11  | ND   | 4.09  | 0.28  | 0.29 | 0.74 | 23.39      |
| 52 | NA     | 908150        | 2.20 | 0.57 | 0.13 | 4.00  | 0.19 | 0.29 | 0.08  | ND   | 4.45  | 0.25  | ND   | 0.33 | 12.49      |
| 53 | NA     | 908151        | 3.86 | 0.20 | 0.11 | 3.46  | 0.20 | 0.16 | 0.03  | ND   | 13.14 | 0.21  | 0.67 | 1.73 | 23.75      |
| 54 | NA     | 908154        | 0.87 | 2.38 | 0.19 | 2.80  | 1.05 | 1.88 | 0.04  | ND   | 6.12  | 0.08  | 0.13 | 0.32 | 15.86      |
| 55 | NA     | 908775        | 0.85 | ND   | 0.15 | ND    | 1.64 | 0.03 | 0.02  | ND   | 4.36  | 0.24  | ND   | 0.10 | 7.40       |
| 56 | NA     | 908777        | 0.04 | ND   | 0.12 | ND    | 1.81 | 0.01 | ND    | ND   | 5.18  | 0.21  | ND   | 0.10 | 7.48       |
| 57 | NA     | K003963       | 0.31 | 0.42 | 0.09 | 2.94  | 0.04 | 0.22 | 0.04  | ND   | 4.34  | 0.29  | ND   | 0.12 | 8.83       |
| 58 | NA     | K004353       | 1.00 | 3.28 | 0.17 | 2.56  | 2.04 | ND   | 0.15  | ND   | 7.76  | 0.19  | ND   | 0.40 | 17.55      |
| 59 | NA     | K004354       | 0.38 | 1.21 | 0.09 | 0.66  | 1.27 | ND   | 0.06  | ND   | 5.20  | 0.33  | ND   | 0.62 | 9.83       |
| 60 | NA     | K004495       | 1.92 | 0.60 | 0.08 | 3.62  | 0.14 | 0.14 | 0.03  | ND   | 2.48  | 0.19  | 0.16 | 1.18 | 10.53      |
| 61 | NA     | K004496       | 1.56 | 0.87 | 0.10 | 2.50  | 1.09 | 0.41 | 0.03  | ND   | 2.81  | 0.16  | 0.31 | 0.66 | 10.51      |
| 62 | NA     | K004497       | 1.77 | 0.20 | 0.06 | 2.91  | 0.04 | 0.08 | 0.02  | ND   | 1.07  | 0.19  | 0.07 | 0.73 | 7.15       |
| 63 | NA     | K004499       | 1.76 | 0.29 | 0.12 | 5.18  | 0.18 | 0.27 | 0.06  | ND   | 2.88  | 0.25  | 0.18 | 0.27 | 11.44      |
| 64 | NA     | K004500       | 1.32 | 0.28 | 0.10 | 3.51  | 0.05 | 0.16 | 0.12  | ND   | 3.63  | 0.65  | 0.10 | 1.09 | 11.02      |
| 65 | NA     | K004512       | 1.58 | 0.23 | 0.08 | 2.42  | 0.10 | 0.12 | 0.18  | ND   | 1.34  | 0.36  | 0.11 | 0.23 | 6.74       |
| 66 | NA     | K004515       | 2.64 | 0.26 | 0.15 | 1.71  | 0.39 | 0.09 | 0.09  | ND   | 8.97  | 0.60  | 0.15 | 0.87 | 15.92      |
| 67 | NA     | K004520       | 1.11 | 0.31 | 0.06 | 5.61  | 0.05 | 0.14 | 0.05  | ND   | 1.99  | 0.26  | 0.15 | 0.64 | 10.36      |
| 68 | NA     | K004521       | 2.05 | 0.47 | 0.17 | 3.64  | 0.32 | 0.58 | 0.06  | ND   | 3.23  | 0.10  | ND   | 0.26 | 10.86      |
| 69 | NA     | K004523       | 0.85 | 0.36 | 0.09 | 3.29  | 0.03 | 0.13 | 0.07  | ND   | 1.28  | 0.28  | 0.09 | 0.36 | 6.83       |
| 70 | NA     | K004524       | 0.80 | 1.60 | 0.13 | 2.19  | 0.71 | 1.73 | 0.09  | ND   | 4.05  | 0.14  | 0.13 | 0.45 | 12.03      |
| 71 | NA     | K004525       | 5.01 | 0.53 | 0.11 | 5.67  | 0.35 | 0.30 | 0.29  | ND   | 5.87  | 0.37  | 0.16 | 0.80 | 19.48      |
| 72 | NA     | K004526       | 0.05 | 1.62 | 0.11 | 0.03  | 3.85 | 0.52 | 0.07  | 0.18 | 2.51  | 1.07  | 0.22 | 0.15 | 10.39      |
| 73 | NA     | K004527       | 2.90 | 0.16 | 0.14 | 2.47  | 0.14 | 0.12 | 0.03  | ND   | 2.55  | 0.09  | 0.07 | 0.18 | 8.84       |

**Table S2: Variation in glucosinolate profile and concentration ( $\mu\text{mol g}^{-1}$  DW) in cabbage head (n=146) (Cont<sup>n</sup>.)**

| SN  | IT No. | Temporary No. | GIB  | PRO  | EPI  | SIN   | GRA  | GNA  | 4HGBS | GER  | GBS  | 4MGBS | GNS  | NGBS | Total GSLs |
|-----|--------|---------------|------|------|------|-------|------|------|-------|------|------|-------|------|------|------------|
| 74  | NA     | K004532       | 2.70 | 0.14 | 0.14 | 2.08  | 0.15 | 0.10 | 0.04  | ND   | 2.76 | 0.43  | 0.08 | 0.18 | 8.80       |
| 75  | NA     | K004535       | 0.90 | 2.72 | 0.25 | 4.31  | 0.58 | 2.05 | 0.08  | ND   | 1.57 | 0.24  | 0.14 | 0.15 | 12.97      |
| 76  | NA     | K004536       | 2.62 | 1.13 | 0.18 | 8.15  | 0.51 | 0.45 | 0.10  | ND   | 4.11 | 0.13  | 0.14 | 0.62 | 18.13      |
| 77  | NA     | K004538       | 1.12 | 0.26 | 0.06 | 4.33  | 0.05 | 0.19 | 0.05  | ND   | 3.04 | 0.35  | 0.14 | 0.58 | 10.17      |
| 78  | NA     | K004540       | 1.71 | 0.31 | 0.14 | 3.61  | 0.16 | 0.22 | 0.11  | ND   | 6.97 | 0.20  | 0.11 | 0.17 | 13.71      |
| 79  | NA     | K004542       | 1.90 | 0.31 | 0.12 | 3.86  | 0.25 | 0.28 | 0.05  | ND   | 2.89 | 0.16  | ND   | 0.17 | 9.99       |
| 80  | NA     | K004543       | 1.48 | 2.25 | 0.15 | 5.79  | 0.66 | 1.50 | 0.03  | ND   | 2.38 | 0.15  | 0.23 | 0.37 | 14.98      |
| 81  | NA     | K004545       | 1.96 | 0.48 | 0.09 | 6.25  | 0.09 | 0.27 | 0.08  | ND   | 3.30 | 0.22  | 0.14 | 0.36 | 13.23      |
| 82  | NA     | K004546       | 0.15 | 0.69 | 0.14 | 8.26  | ND   | 0.80 | 0.18  | ND   | 3.71 | 0.26  | ND   | 0.14 | 14.32      |
| 83  | NA     | K005289       | 1.12 | 0.23 | 0.07 | 4.26  | 0.03 | 0.16 | 0.11  | ND   | 1.42 | 0.25  | 0.14 | 0.06 | 7.87       |
| 84  | NA     | K005290       | 0.93 | 0.19 | 0.09 | 1.23  | 0.08 | 0.07 | 0.03  | ND   | 3.00 | 0.11  | 0.09 | 0.19 | 6.01       |
| 85  | NA     | K014433       | 2.79 | 0.70 | 0.08 | 7.61  | 0.30 | 0.39 | 0.12  | 0.12 | 4.71 | 0.22  | ND   | 0.49 | 17.53      |
| 86  | NA     | K014950       | 2.04 | 0.75 | 0.07 | 4.69  | 0.27 | ND   | 0.04  | ND   | 1.44 | 0.23  | ND   | 0.46 | 9.99       |
| 87  | NA     | K014955       | 1.38 | 0.43 | 0.10 | 3.58  | 0.10 | ND   | 0.04  | ND   | 2.48 | 0.24  | ND   | 0.22 | 8.57       |
| 88  | NA     | K044570       | 1.74 | 0.36 | 0.08 | 6.73  | 0.05 | 0.29 | 0.02  | ND   | 1.76 | 0.09  | 0.10 | 0.31 | 11.54      |
| 89  | NA     | K045062       | 3.16 | 0.90 | 0.12 | 6.88  | 0.54 | 0.46 | 0.28  | ND   | 7.97 | 0.29  | 0.12 | 0.90 | 21.63      |
| 90  | NA     | K045064       | 1.22 | 2.06 | 0.21 | 10.74 | 0.30 | 1.93 | 0.04  | 0.15 | 5.88 | 0.21  | ND   | 0.60 | 23.33      |
| 91  | NA     | K060636       | 0.74 | 1.97 | 0.15 | 0.94  | 2.64 | ND   | 0.06  | ND   | 3.96 | ND    | ND   | 0.44 | 10.90      |
| 92  | NA     | K100196       | 0.86 | 0.08 | 0.06 | 3.92  | ND   | ND   | ND    | ND   | 3.98 | 0.19  | ND   | 0.41 | 9.50       |
| 93  | NA     | K100197       | 0.31 | 2.49 | 0.18 | 0.77  | 1.47 | 2.81 | 0.07  | 0.10 | 3.26 | 0.16  | ND   | 0.44 | 12.05      |
| 94  | NA     | K121377       | 1.25 | 0.02 | 0.11 | 0.02  | 2.23 | 0.06 | 0.05  | 0.15 | 6.80 | 0.32  | ND   | 0.75 | 11.76      |
| 95  | NA     | K125498       | 0.04 | ND   | 0.08 | ND    | 1.23 | ND   | 0.08  | ND   | 7.62 | 0.16  | ND   | 0.26 | 9.48       |
| 96  | NA     | K125499       | 0.28 | ND   | 0.07 | 0.03  | 0.90 | 0.03 | 0.05  | ND   | 1.75 | 0.59  | ND   | 0.28 | 3.99       |
| 97  | NA     | K134135       | 0.70 | 1.04 | 0.11 | 0.92  | 1.11 | 0.68 | 0.07  | 0.13 | 3.38 | 0.10  | ND   | 0.20 | 8.45       |
| 98  | NA     | K134260       | 0.98 | 1.82 | 0.09 | 2.33  | 0.73 | 1.37 | 0.09  | 0.13 | 2.04 | 0.12  | ND   | 0.12 | 9.82       |
| 99  | NA     | K134820       | 0.01 | 0.02 | 0.10 | ND    | 2.31 | 0.11 | 0.03  | 0.21 | 5.76 | 0.78  | ND   | 0.40 | 9.73       |
| 100 | NA     | K136870       | 0.30 | 1.06 | 0.10 | 0.23  | 0.75 | 0.27 | 0.09  | ND   | 3.40 | 0.43  | 0.13 | 0.87 | 7.63       |
| 101 | NA     | K138940       | 2.10 | 0.27 | 0.09 | 3.40  | 0.12 | 0.11 | 0.05  | ND   | 1.69 | 0.21  | 0.15 | 0.26 | 8.44       |
| 102 | NA     | K139046       | 0.20 | 1.70 | 0.17 | 0.42  | 0.70 | 1.21 | 0.11  | ND   | 3.15 | 0.72  | ND   | 0.40 | 8.78       |
| 103 | NA     | K139130       | 3.39 | 0.89 | 0.15 | 10.05 | 0.26 | 0.49 | 0.09  | ND   | 4.90 | 0.17  | 0.24 | 0.10 | 20.72      |
| 104 | NA     | K139318       | 0.78 | 2.04 | 0.20 | 1.94  | 0.74 | 1.45 | 0.06  | 0.10 | 3.18 | 0.32  | 0.09 | 0.08 | 10.91      |
| 105 | NA     | K142931       | 0.01 | 0.01 | 0.04 | 0.01  | 3.36 | 0.03 | 0.06  | 0.26 | 4.03 | 2.57  | ND   | 0.39 | 10.77      |
| 106 | NA     | K145099       | 0.33 | 1.20 | 0.11 | 0.60  | 0.69 | 0.91 | 0.05  | ND   | 3.92 | ND    | ND   | 0.48 | 8.29       |
| 107 | NA     | K145187       | 0.57 | 3.41 | 0.15 | 2.00  | 1.53 | 2.79 | ND    | 0.16 | 6.40 | 0.22  | ND   | 0.96 | 18.19      |
| 108 | NA     | K146556       | 0.27 | 0.02 | 0.07 | 0.01  | 1.03 | 0.02 | 0.03  | ND   | 2.30 | 0.24  | ND   | 0.08 | 4.05       |
| 109 | NA     | K154726       | 1.28 | 0.60 | 0.07 | 1.71  | 0.34 | 0.32 | 0.06  | 0.12 | 2.87 | 0.25  | ND   | 0.15 | 7.77       |
| 110 | NA     | K155038       | 0.05 | 3.86 | 0.26 | 0.09  | 2.65 | 0.92 | 0.04  | 0.56 | 5.47 | 0.45  | ND   | 0.35 | 14.69      |
| 111 | NA     | K155067       | 0.64 | ND   | 0.14 | 0.05  | 2.15 | ND   | ND    | 0.31 | 5.59 | 0.67  | 0.21 | 0.19 | 9.95       |
| 112 | NA     | K155659       | 1.36 | 0.41 | 0.08 | 4.59  | 0.05 | 0.22 | 0.03  | ND   | 1.74 | 0.26  | 0.07 | 0.26 | 9.05       |
| 113 | NA     | K155662       | 1.36 | 0.62 | 0.11 | 8.17  | 0.26 | 1.03 | 0.02  | 0.14 | 3.52 | 0.22  | 0.12 | 0.28 | 15.85      |
| 114 | NA     | K155664       | 1.48 | 0.34 | 0.12 | 5.69  | 0.11 | 0.26 | 0.02  | ND   | 2.23 | 0.24  | ND   | 0.48 | 10.97      |
| 115 | NA     | K164144       | 0.43 | 0.02 | 0.10 | 0.08  | 2.33 | 0.03 | 0.03  | 0.28 | 4.27 | 0.21  | ND   | 0.52 | 8.29       |
| 116 | NA     | K164742       | 0.42 | 2.32 | 0.17 | 1.45  | 0.50 | 2.11 | 0.03  | 0.18 | 2.39 | 0.10  | 0.06 | 0.22 | 9.94       |
| 117 | NA     | K166200       | 2.46 | 0.88 | 0.18 | 3.79  | 0.55 | 0.32 | ND    | ND   | 4.81 | 0.28  | ND   | 0.34 | 13.60      |
| 118 | NA     | K166201       | 0.80 | 1.40 | 0.14 | 1.36  | 0.59 | 0.49 | 0.06  | ND   | 3.08 | 0.11  | 0.12 | 0.08 | 8.23       |
| 119 | NA     | K166205       | 1.84 | 0.08 | 0.09 | 4.11  | 0.06 | 0.08 | 0.02  | ND   | 6.34 | 0.22  | ND   | 2.00 | 14.83      |
| 120 | NA     | K166231       | 2.11 | 0.22 | 0.08 | 3.44  | 0.09 | 0.08 | 0.08  | ND   | 1.68 | 0.38  | 0.08 | 0.35 | 8.60       |
| 121 | NA     | K166237       | 0.51 | 1.73 | 0.16 | 0.71  | 1.63 | 1.16 | 0.06  | ND   | 3.03 | 0.08  | ND   | 0.34 | 9.41       |
| 122 | NA     | K166240       | 0.65 | 3.06 | 0.19 | 1.49  | 1.78 | 2.36 | 0.06  | 0.22 | 4.42 | ND    | ND   | 0.16 | 14.41      |
| 123 | NA     | K175584       | 1.25 | 0.61 | 0.06 | 6.03  | ND   | 0.50 | 0.01  | ND   | 2.74 | 0.27  | ND   | 0.21 | 11.70      |
| 124 | NA     | K176590       | 0.44 | 0.27 | 0.05 | 1.27  | 0.03 | 0.14 | 0.04  | ND   | 1.89 | 0.22  | ND   | 0.14 | 4.51       |
| 125 | NA     | K176592       | 2.12 | 0.34 | 0.06 | 4.22  | 0.18 | 0.23 | 0.06  | ND   | 1.45 | 0.22  | ND   | 0.22 | 9.09       |
| 126 | NA     | K176593       | 0.69 | 2.40 | 0.16 | 1.65  | 0.53 | 1.20 | 0.03  | ND   | 1.32 | 0.26  | 0.07 | 0.20 | 8.50       |
| 127 | NA     | K176594       | 0.30 | 1.57 | 0.17 | 0.58  | 1.54 | 1.08 | 0.04  | ND   | 4.38 | 0.17  | ND   | 0.21 | 10.04      |
| 128 | NA     | K176595       | 1.34 | 0.19 | 0.06 | 3.62  | ND   | 0.09 | ND    | ND   | 1.90 | 0.14  | ND   | 0.27 | 7.62       |
| 129 | NA     | K195951       | 2.86 | 0.33 | 0.08 | 6.66  | 0.08 | 0.14 | 0.10  | ND   | 2.57 | 0.33  | ND   | 0.56 | 13.72      |
| 130 | NA     | K204466       | 2.60 | 0.40 | 0.07 | 5.26  | 0.08 | 0.31 | 0.01  | ND   | 3.78 | 0.34  | ND   | 0.49 | 13.34      |
| 131 | NA     | K222934       | 0.80 | 0.06 | 0.08 | 2.30  | ND   | 0.04 | 0.03  | ND   | 2.18 | 0.20  | ND   | 0.31 | 6.01       |
| 132 | NA     | K229554       | 1.29 | 0.48 | 0.08 | 3.33  | 0.17 | 0.34 | 0.03  | ND   | 2.54 | 0.14  | ND   | 0.11 | 8.49       |
| 133 | NA     | K243791       | 0.41 | 1.73 | 0.11 | 0.90  | 1.44 | 2.11 | ND    | ND   | 4.50 | 0.12  | ND   | 0.40 | 11.71      |
| 134 | NA     | K243819       | 1.39 | 1.40 | 0.11 | 5.50  | 0.44 | 0.56 | 0.03  | ND   | 2.14 | 0.11  | 0.36 | 0.05 | 12.08      |
| 135 | NA     | K246353       | 1.30 | 0.26 | 0.12 | 4.00  | 0.05 | 0.12 | 0.02  | ND   | 2.02 | 0.09  | ND   | 0.10 | 8.06       |
| 136 | NA     | K246359       | 1.24 | 0.06 | 0.09 | 1.67  | 0.01 | 0.03 | 0.03  | ND   | 3.24 | 0.43  | ND   | 0.34 | 7.12       |
| 137 | NA     | K246894       | 2.83 | 0.25 | 0.14 | 9.53  | 0.09 | 0.05 | 0.06  | ND   | 7.48 | 0.41  | ND   | 0.49 | 21.34      |
| 138 | NA     | K246912       | 2.16 | 0.28 | 0.12 | 2.26  | 0.13 | 0.07 | 0.02  | ND   | 4.98 | 0.34  | ND   | 0.37 | 10.72      |
| 139 | NA     | K247130       | 1.44 | 0.56 | 0.10 | 8.19  | 0.13 | 0.29 | 0.04  | ND   | 6.05 | 0.22  | ND   | 0.67 | 17.69      |
| 140 | NA     | K247132       | 0.40 | 0.91 | 0.09 | 0.86  | 0.47 | 0.60 | ND    | ND   | 3.64 | 0.22  | ND   | 0.21 | 7.38       |
| 141 | NA     | K247133       | 1.82 | 0.32 | 0.10 | 5.60  | ND   | 0.28 | 0.02  | ND   | 2.58 | 0.07  | 0.44 | 0.08 | 11.31      |
| 142 | NA     | K247714       | 0.05 | 0.04 | 0.09 | 0.06  | 2.77 | 0.03 | 0.03  | 0.61 | 2.72 | 0.53  | ND   | 0.47 | 7.41       |
| 143 | NA     | K247741       | 0.78 | 0.04 | 0.09 | 0.02  | 3.10 | 0.04 | 0.04  | ND   | 3.72 | 0.69  | 0.27 | 0.11 | 8.90       |
| 144 | NA     | K247748       | 1.35 | 1.08 | 0.12 | 2.59  | 1.13 | 0.53 | 0.07  | ND   | 3.09 | 0.61  | 0.36 | 0.13 | 11.07      |
| 145 | NA     | K247794       | 0.56 | 1.52 | 0.16 | 0.58  | 1.43 | 0.76 | 0.06  | ND   | 3.79 | 0.22  | 0.56 | 0.28 | 9.92       |
| 146 | NA     | K254252       | 2.10 | 0.54 | 0.10 | 5.06  | 0.14 | 0.26 | ND    | ND   | 2.72 | 1.41  | ND   | 0.54 | 12.86      |

Each value represents the average of 3 replications. NA: Information not available; ND: Not detected. GIB: glucoiberin; PRO: progoitrin; EPI: epiprogoitrin; SIN: sinigrin; GRA: glucoraphanin; GNA: gluconapin; GER: glucoerucin; 4HGBS:4-hydroxyglucobrassicin; GBS: glucobrassicin; 4MGBS: 4-methoxyglucobrassicin; NGBS: neoglucobrassicin; GNS: gluconastrutiin.
